# Supplementary material for: Assessment of Aleutian mink disease virus (AMDV) prevalence in feral American mink in Iceland. Case study of a pending epizootiological concern in Europe
Source: PeerJ. 2021 Sep 17;9:e12060. doi: 10.7717/peerj.12060 (PMC8451439; doi:10.7717/peerj.12060)
Supplement: Supplemental Information 1 [file peerj-09-12060-s001.xlsx]

## Sheet: A) AMDV in the spleen
The detection of AMDV in the spleen of male and female individuals of American mink (n = 164) in eight regions of Iceland.
Mink no.	Sex	AMDV positive	County
3209	M	0	Dalasysla
3210	M	0	Dalasysla
3211	M	0	Snaefellsnes- og Hnappadalssysla
3212	M	0	Dalasysla
3213	F	1	Dalasysla
3214	M	1	Dalasysla
3215	M	1	Dalasysla
3216	M	1	Dalasysla
3217	F	0	Dalasysla
3218	M	0	Dalasysla
3219	M	0	Dalasysla
3220	F	0	Dalasysla
3221	M	0	Dalasysla
3222	M	0	Dalasysla
3223	F	0	Dalasysla
3224	M	0	Dalasysla
3225	M	0	Dalasysla
3226	F	0	Dalasysla
3227	F	0	Dalasysla
3228	F	0	Dalasysla
3229	F	0	Dalasysla
3230	F	0	Dalasysla
3231	M	0	A-Hunavatnssysla
3232	M	1	A-Hunavatnssysla
3233	F	1	A-Hunavatnssysla
3234	M	0	A-Hunavatnssysla
3235	M	0	Dalasysla
3236	M	1	A-Hunavatnssysla
3237	M	1	A-Hunavatnssysla
3238	F	1	A-Hunavatnssysla
3239	M	0	A-Hunavatnssysla
3240	M	1	A-Hunavatnssysla
3241	F	1	A-Hunavatnssysla
3242	M	0	A-Hunavatnssysla
3243	M	1	A-Hunavatnssysla
3244	M	1	A-Hunavatnssysla
3245	M	1	A-Hunavatnssysla
3246	M	0	A-Hunavatnssysla
3247	M	0	A-Hunavatnssysla
3248	F	0	Dalasysla
3249	M	0	Dalasysla
3250	M	0	NO INFO
3251	F	0	Dalasysla
3252	F	0	Dalasysla
3253	M	0	Dalasysla
3254	M	0	Dalasysla
3255	M	0	Dalasysla
3256	F	0	Dalasysla
3257	M	0	Dalasysla
3258	M	0	Dalasysla
3259	M	0	Dalasysla
3260	M	0	Dalasysla
3261	M	0	Dalasysla
3262	M	0	Snaefellsnes- og Hnappadalssysla
3263	F	0	Dalasysla
3264	F	0	Dalasysla
3265	F	0	Snaefellsnes- og Hnappadalssysla
3266	F	0	Dalasysla
3267	F	0	Dalasysla
3268	F	0	Dalasysla
3269	M	0	Snaefellsnes- og Hnappadalssysla
3270	M	0	Dalasysla
3271	M	0	Dalasysla
3272	F	0	Dalasysla
3273	M	0	Dalasysla
3274	M	0	Dalasysla
3275	F	0	Dalasysla
3276	F	0	Dalasysla
3277	M	0	Dalasysla
3278	M	0	Dalasysla
3279	F	0	Dalasysla
3280	M	0	Dalasysla
3281	M	0	Dalasysla
3282	F	0	Dalasysla
3283	F	0	Dalasysla
3284	M	0	Dalasysla
3285	F	0	Dalasysla
3286	M	0	Dalasysla
3287	F	0	Snaefellsnes- og Hnappadalssysla
3288	F	0	Dalasysla
3289	F	0	Dalasysla
3290	F	0	Dalasysla
3291	M	0	Dalasysla
3292	F	0	Dalasysla
3293	M	0	Snaefellsnes- og Hnappadalssysla
3294	M	0	Dalasysla
3295	F	0	Dalasysla
3296	M	0	Dalasysla
3297	M	0	Dalasysla
3298	M	0	Dalasysla
3299	F	0	Dalasysla
3300	M	0	Dalasysla
3301	M	1	V-Hunavatnssysla
3302	F	0	N-Isafjardarsysla
3303	M	0	N-Isafjardarsysla
3304	M	0	N-Isafjardarsysla
3305	M	0	N-Isafjardarsysla
3306	F	0	N-Isafjardarsysla
3307	F	0	N-Isafjardarsysla
3308	M	0	N-Isafjardarsysla
3309	F	0	N-Isafjardarsysla
3310	M	0	N-Isafjardarsysla
3311	F	0	Dalasysla
3312	M	0	Dalasysla
3313	F	0	Dalasysla
3314	M	0	Borgarfjardarsysla
3315	M	0	N-Isafjardarsysla
3316	F	0	N-Isafjardarsysla
3317	F	1	Dalasysla
3318	M	1	Dalasysla
3319	M	0	S-Mulasysla
3321	F	0	Dalasysla
3322	M	0	Borgarfjardarsysla
3323	F	0	Dalasysla
3324	F	0	Borgarfjardarsysla
3325	F	0	Borgarfjardarsysla
3326	F	0	Snaefellsnes- og Hnappadalssysla
3327	M	0	Snaefellsnes- og Hnappadalssysla
3328	M	0	Borgarfjardarsysla
3329	F	0	Dalasysla
3330	M	0	Borgarfjardarsysla
3331	F	0	Dalasysla
3332	M	0	S-Mulasysla
3333	F	0	S-Mulasysla
3334	F	0	N-Mulasysla
3335	F	1	N-Mulasysla
3336	M	1	N-Mulasysla
3337	M	1	S-Mulasysla
3338	F	0	Dalasysla
3339	F	0	Dalasysla
3340	M	1	V-Hunavatnssysla
3341	F	1	A-Hunavatnssysla
3342	M	0	A-Hunavatnssysla
3343	M	0	A-Hunavatnssysla
3344	F	0	A-Hunavatnssysla
3345	F	0	Borgarfjardarsysla
3346	F	0	Borgarfjardarsysla
3347	M	0	Borgarfjardarsysla
3348	F	1	Borgarfjardarsysla
3349	M	1	Borgarfjardarsysla
3350	M	0	A-Hunavatnssysla
3351	F	1	S-Mulasysla
3352	M	0	N-Mulasysla
3353	M	1	N-Mulasysla
3354	M	1	S-Mulasysla
3355	M	1	S-Mulasysla
3356	M	0	S-Mulasysla
3357	M	0	A-Hunavatnssysla
3358	M	1	A-Hunavatnssysla
3359	M	1	A-Hunavatnssysla
3360	M	1	A-Hunavatnssysla
3361	M	1	A-Hunavatnssysla
3362	M	1	A-Hunavatnssysla
3363	M	0	A-Hunavatnssysla
3364	F	0	A-Hunavatnssysla
3365	F	1	A-Hunavatnssysla
3366	F	1	A-Hunavatnssysla
3367	M	1	A-Hunavatnssysla
3368	M	0	A-Hunavatnssysla
3369	M	0	A-Hunavatnssysla
3370	M	1	A-Hunavatnssysla
3371	M	1	A-Hunavatnssysla
3372	M	1	A-Hunavatnssysla
3373	M	0	A-Hunavatnssysla

## Sheet: B) Morphometric GPS data
Morphometric GPS data.
Latitude	Longitude	Gender	AMDV	Spleen weight (g)	Weight (g)	Body length (without tail)
65.0263	-22.2897	F	1	1.81	670	36
65.0575	-22.2501	F	0	1.44	697	34.5
65.0674	-22.2669	F	0	1.02	966	38.5
65.0471	-22.3173	F	0	2.64
65.0303	-22.3658	F	0	1.92	691	37
65.0388	-22.3105	F	0	2.28	854	36.2
65.0625	-22.2746	F	0	1.16
65.3487	-20.0468	F	1	2.72	773
65.2939	-19.513	F	1	1.49	477	35
65.3182	-19.5347	F	1	5	674	36
65.0644	-22.2771	F	0	3.37	878	36.5
65.0551	-22.2671	F	0	1.52	745	36.2
65.0388	-22.3101	F	0	3.72	826	34.7
65.0677	-22.2664	F	0	1.72	790	35
65.0476	-22.3255	F	0	1.62	591	32.3
65.0519	-22.2542	F	0	1.08	733	35.5
65.0467	-22.4046	F	0	2.24	734	34.7
65.0665	-22.2678	F	0	1.67	726	35.9
65.057	-22.2973	F	0	1.03	815	35
65.0399	-22.3364	F	0	3.15	734
65.0644	-22.2801	F	0	3.18	749	32
65.0478	-22.325	F	0	3.54	954	35.5
65.0327	-22.3041	F	0	3.34	838	33.4
65.0408	-22.3122	F	0	2.24	817
65.0549	-22.2579	F	0	2.59	1018
65.0388	-22.3099	F	0	2.46	841	34.5
65.0395	-22.3347	F	0	1.88	705
65.0818	-22.447	F	0	2.33	723	33
65.0427	-22.3242	F	0	4.54	1036	34.5
65.0506	-22.3082	F	0	0.78	715	36.5
65.0325	-22.3072	F	0	3.01	851
65.0482	-22.316	F	0	2.61	869	33.5
65.0617	-22.2731	F	0	2.74	700
66.0933	-23.1494	F	0	1.37	527	31
66.0948	-23.1449	F	0	4.78	849	36
66.0819	-23.1423	F	0	1.3	650	33
66.0919	-23.1465	F	0	3.95	580	34
65.0327	-22.3046	F	0	0.56	647	34
65.0523	-22.3095	F	0	2.21	754	35.5
66.0902	-23.1405	F	0	1.5	691	35.5
65.0566	-22.2614	F	1	2.3		36
65.0315	-22.1566	F	0	1.35
64.2358	-21.502	F	0	2.18	599	38.5
64.2502	-21.4556	F	1	1.82	610	34
64.5785	-23.0519	F	0	2.57	709	35
65.0263	-22.3646	F	0	1.4	575
65.161	-14.2281	F	0	1.6	744	36
65.336	-14.1684	F	0	3.28
65.311	-14.1786	F	1	2.08	617	35
65.06	-22.288	F	0	2.98	900	38
65.0584	-22.2828	F	0	1.9	754	35
65.3241	-19.5464	F	1	3.06	659	36
65.2601	-19.4789	F	0	2.57	469	35
64.2377	-21.4969	F	0	1.82	611	34.5
64.2249	-21.508	F	0	5.85	1073	37
64.2584	-21.5677	F	1	2.45	505	35.5
65.0045	-14.4015	F	1	1.76	546	35.5
65.3781	-20.1699	F	0	1.81	713	36.5
65.3841	-20.1691	F	1	2.2	554	35.5
65.2612	-19.4793	F	1	5.04	562	35
65.0705	-22.2847	M	0	0.68	1518	46
65.0408	-22.312	M	0	2.05	1335	44
65.0341	-22.3795	M	0	2.93	1330	43
65.0618	-22.2565	M	0	2.88	1789	45.5
65.0706	-22.2717	M	1	2.52	1309	42
65.0408	-22.3272	M	1	2.78	1166	40.5
65.0727	-22.2734	M	1	3.5	1354
65.0601	-22.2481	M	0	2.64	1369	41.5
65.0585	-22.2409	M	0	2.25	1351	42
65.0438	-22.3189	M	0	5.38	1468	42
65.0475	-22.3198	M	0	1.82	1038	36.5
65.0638	-22.2838	M	0	4.06	1318	42
65.3644	-20.0687	M	0	2.16	1462	43
65.2939	-19.513	M	1	3	974	39.5
65.1462	-19.3502	M	0	1.24	913
65.0385	-22.3061	M	0	2.37
65.1462	-19.3502	M	1	2.68	841	41.5
65.3716	-20.0847	M	1	1.28	950	40
65.3723	-20.0848	M	0	1.71	973	41.3
65.2589	-19.4792	M	1	2.98	1122	40.5
65.2685	-19.4821	M	0	2	1378	38
65.2685	-19.4821	M	1	2.06	861	39
65.2589	-19.4792	M	1	2.21	1262	42
65.3711	-20.0841	M	0	1.95	1230	42.5
65.2686	-19.4849	M	0	4	1048	42.5
65.0716	-22.272	M	0	2.36	1422	40.5
65.0714	-22.2715	M	0	3.83	1615	42
65.0464	-22.3258	M	0	3.88	1336	42
65.0618	-22.2565	M	0	2.51	1291	44
65.0515	-22.2795	M	0	0.95	1114	43
65.0382	-22.3404	M	0	5.36	1626	44.7
65.0427	-22.3231	M	0	2.4	1459	41.5
65.0607	-22.2657	M	0	2.35	1289
65.0508	-22.2952	M	0	1.53
64.5523	-23.4931	M	0	3.31	1173	40.5
65.0689	-22.2924	M	0	2.05	1439	44
65.0684	-22.2632	M	0	2.46	1156
65.0456	-22.3316	M	0	3.27	1420	41.7
65.0618	-22.2602	M	0	3.23	1224	40
65.0367	-22.3482	M	0	2.66	1066	37
65.0666	-22.2808	M	0	2.64	1360	39.9
65.0649	-22.2685	M	0	4.22	1654	40.2
65.0365	-22.3157	M	0	2.81	1044	38
65.0303	-22.3616	M	0	2.36	997	38
65.0088	-22.035	M	0	2.9	1161	37
65.0865	-22.4856	M	0	2.65	1388	38.7
65.0509	-22.2953	M	0	2.62	1188	40.6
65.0571	-22.2971	M	0	1.24	984	40.4
65.0736	-22.2744	M	0	1.81	1570	44
65.0618	-22.2563	M	0	2.17	1359	42.5
65.0703	-22.2771	M	0	2.83	805	41.5
65.2568	-21.0221	M	1	4.04	1454	46
66.0935	-23.1465	M	0	2.22	875	39
66.0905	-23.1425	M	0	2.58	1278	41.5
66.0872	-23.1349	M	0	1.65	923	37.5
66.0942	-23.147	M	0	2.7	898	38.5
66.0819	-23.1423	M	0	2.38	1200	40.5
65.0565	-22.2931	M	0	2.98	1195	40
64.3607	-21.5481	M	0	3.74	1259	43
66.0902	-23.1405	M	0	2.08	1086	41.5
65.0685	-22.271	M	1	1.25	1442
64.2405	-21.4889	M	0	2.38	1258	42
64.5785	-23.0502	M	0	5.3	1430	44
64.1812	-21.5965	M	0	3.84	1370	43
64.2334	-21.5114	M	1	3.04	1417	45
65.1167	-14.2935	M	0	3.78	1104	42.5
65.3255	-14.1096	M	1	1.13	748	37
65.1643	-14.2368	M	1	1.38	586	35
65.2579	-21.0214	M	1	4.34	1172	44
65.384	-20.1602	M	0	1.87	699	35.5
65.3366	-20.073	M	0	1.78	816	36.5
64.2225	-21.5533	M	0	3.26	1106	45.5
64.2292	-21.5625	M	1	9.5	1934	45
65.3707	-20.0857	M	0	3.41	1552	41.5
65.0096	-14.5665	M	0	4.42	1079	41
65.0051	-15.0035	M	1	2.43	1033	42.5
65.2494	-14.1786	M	1	2.31	778	41.5
65.2479	-14.1789	M	1	1.79	795	40.5
65.2501	-14.173	M	0	1.25	615	40
65.3419	-20.0773	M	0	2.31	1283	42
65.4353	-20.0828	M	1	2.82	855	37.5
65.2939	-19.513	M	1	6.89	1087	41
65.137	-19.4061	M	1	6.28	1082	40.5
65.2437	-19.3786	M	1	7.33	1163	43
65.3356	-20.0725	M	1	2.14	793	36
65.3741	-20.1444	M	0	5.52	1133	42.5
65.2453	-19.3799	M	1	5.13	1110	43.5
65.247	-19.386	M	0	2.1	1125	43.5
65.4569	-20.1566	M	0	2.82	1272	42.5
65.1356	-19.4027	M	1	5.21	811	41.5
65.3015	-19.4628	M	1	2.52	1116	40.5
65.2434	-19.3772	M	1	6.28	1058	40.5
65.3479	-20.0461	M	0	1.46	885	42
65.1639	-19.4193	M	1	2.13	1071
