# Supplementary material for: Assessment of Aleutian mink disease virus (AMDV) prevalence in feral American mink in Iceland. Case study of a pending epizootiological concern in Europe
Source: PeerJ journal article supplement (doi:10.7717/peerj.12060), 2021-09-17
Supplement: Supplemental_Information_S1.pdf [file Supplemental_Information_S1.pdf]

## Genbank Accesion

| number   | AMDV isolate                  |
|----------|-------------------------------|
| MW772385 | IS_H1_R3213-R3214-R3215-R3216 |
| MW772386 | IS_H2_R3232                   |
| MW772387 | IS_H3_R3233                   |
| MW772388 | IS_H4_R3236                   |
| MW772389 | IS_H5_R3237                   |
| MW772390 | IS_H6_R3238                   |
| MW772391 | IS_H7_R3240                   |
| MW772392 | IS_H8_R3241                   |
| MW772393 | IS_H9_R3243-R3245             |
| MW772394 | IS_H10_R3244                  |
| MW772395 | IS_H11_R3301-R3340            |
| MW772396 | IS_H12_R3317-R3318            |
| MW772397 | IS_H13_R3335                  |
| MW772398 | IS_H14_R3336                  |
| MW772399 | IS_H15_R3337                  |
| MW772400 | IS_H16_R3341                  |
| MW772401 | IS_H17_R3348                  |
| MW772402 | IS_H18_R3349                  |
| MW772403 | IS_H19_R3351                  |
| MW772404 | IS_H20_R3353                  |
| MW772405 | IS_H21_R3354                  |
| MW772406 | IS_H22_R3355                  |
| MW772407 | IS_H23_R3358                  |
| MW772408 | IS_H24_R3359                  |
| MW772409 | IS_H25_R3360                  |
| MW772410 | IS_H26_R3361                  |
| MW772411 | IS_H27_R3362                  |
| MW772412 | IS_H28_R3365                  |
| MW772413 | IS_H29_R3366                  |
| MW772414 | IS_H30_R3367                  |
| MW772415 | IS_H31_R3370                  |
| MW772416 | IS_H32_R3371                  |
| MW772417 | IS_H33_R3372                  |

>Seq1 [organism=organism=Aleutian mink disease virus] Aleutian mink disease virus isolate  
AMDV\_IS\_H1 non-structural protein 1 gene (NS1), partial cds  
CTTTGATAAAGATGAAGATCCTAAGGATATTCAAAAATCCTTAGGTTGGTTTATT  
AAAAAACTAAATAGAGACATAGCAGTTGTTTATAGTAACCATCATTGTGACATAC  
AAGGTATACAAGATCCTGAAAGTAGATCTAATAACTTGAAAGTATGGATTGAAG  
ATGGGCCTACTAAACCTTACAAATACTTTAACAAACAAACCAACAAGAATACA  
ACAAACCAGTGAACATACGTGACTATACATTAATATATCTGTTTAAACAAGATAA  
GATAACAGAAGAAGGTATGGATGGTTACTATGCTAGTGGTAACGGCGGCATTAT  
T

>Seq2 [organism=organism=Aleutian mink disease virus] Aleutian mink disease virus isolate AMDV\_IS\_H2 non-structural protein 1 gene (NS1), partial cds

CTTTGATAAAGATGAAGATCCTAAGGATATTTAAAAATCTTTAGGTTGGTTTATT  
AAAAAACTAAGTAAAGATATAGCAGTTGTTTATAGTAACCATCATTGTGACATGC  
AAGGTATAACAAGATTCTGAAAGTAGATCTAATAACTTGAAAATATGGATTGAAG  
ATGGACCTACCAAACCTTACAAATACTTTAACAAACAAACCAAACAAGAATACA  
ACAAACCAGTGAACATACGTGACTATACATTAATATATCTGTTTAAACAAAGATAA  
GATAACAGAGGAAGGTATGGATGGTACTATGCTAGTGGTAACGGCGGCATTAT  
T

>Seq3 [organism=organism=Aleutian mink disease virus] Aleutian mink disease virus isolate AMDV\_IS\_H3 non-structural protein 1 gene (NS1), partial cds

CTTTGATAAAGATGAAGATCCTAAGGATATTCAAAAATCCTTAGGTTGGTTTGT  
AAAAAACTAATAAAGACTTAGCAGTTGTTTATAGTAACCATCATTGTGACATAC  
AAGGTATAACAAGATCCTGAAAGTAGATCTAATAACTTGAAAATATGGATTGAAG  
ATGGACCTACCAAACCTTACAAATACTTTAACAGACAAACCAAACAAGAATACA  
ACAAACCAGTGAACATGCGTGACTATACATTAATATATCTGTTTAAACAAAGATAA  
AATAACAGAAGAAAGTATGGTTGGTACTATGCTAGTGGTAACGGTGGCATTATT

>Seq4 [organism=organism=Aleutian mink disease virus] Aleutian mink disease virus isolate AMDV\_IS\_H4 non-structural protein 1 gene (NS1), partial cds

CTTTAATAAAGATGAAGATCCTAAGGATATTCAAAAATCCTTAGGTTGGTTTATT  
AAAAAACTAAGTAAAGACTTAGCAGTTGTTTATAGTAACCATCATTGTGACCTGC  
AAGGTATAACAAGACTCTGAAAGTAGATCTAATAACTTAAAAGTATGGATTGAAG  
ATGGGCCTACAAAACCTTACAAATACTTTAACAGACAAACCAAACAAGAATACA  
ACAAACCAGTAAACATACGTGACTATACAATAGTATATCTGTTTAAACAAAGATA  
AGATAACAGAAGAAGGTATGGATGGTACTATGCTAGTGGTAACGGCGGCCTTAA  
TT

>Seq5 [organism=organism=Aleutian mink disease virus] Aleutian mink disease virus isolate AMDV\_IS\_H5 non-structural protein 1 gene (NS1), partial cds

CTTTAATAAAGATGAAGATCCTAAGGATATTCAAAAATCCTTAGGTTGGTTTATT  
AAAAAACTAAGTAAAGACATAGCAGTTGTTTATAGTAACCATCATTGTGACCTGC  
AAGGTATAACAAGACTCTGAAAGTAGATCTAATAACTTGAAAGTATGGATTGAAG  
ATGGACCTACAAAACCTTACAAATACTTTAACAAACAAACCAAACAAGAATACA  
ACAAACCAGTGAACATACGTGACTATACATGTGTATATCTGTTTAAACAAAGATAA  
GATAACAGAAGAAGGTATGAATGGTACTATGCTAGTGGTAACGGCGGCATTAT  
T

>Seq6 [organism=organism=Aleutian mink disease virus] Aleutian mink disease virus isolate AMDV\_IS\_H6 non-structural protein 1 gene (NS1), partial cds

CTTTGATAAAGATGAAGATCCTAAGGATATTCAAAAATCCTTAGGTTGGTTTGT  
AAAAAACTAAGTAGAGACATAGCAGTTGTTTATAGTAACCATCATTGTGACCTGC  
AAGGTATAACAAGATTCTGAAGGTAGATCTAATAACTTGAAAGTATGGATTGAAG  
ATGGACCTACAAAACCTTACAAATACTTTAACAAACAAACCAAACAAGAATACA  
ACAAACCAGTGAACATACGTGACTATACATGTGTATATCTGTTTAAACAAAGATAA  
GATAACAGAAGAAGGTATGGATGGTACTATGCTAGTGGTAACGGTGGCATTAT  
T

>Seq7 [organism=organism=Aleutian mink disease virus] Aleutian mink disease virus isolate AMDV\_IS\_H7 non-structural protein 1 gene (NS1), partial cds

CTTTGATAAAGATGAAGATCCTAAGGATATTCAAAAATCCTTAGGTTGGTTTGT  
AAAAAACTAAGTAGAGACATAGCAGTTGTTTATAGTAACCATCATTGTGACCTGC  
AAGGTATAACAAGATTCTGAAGGTAGATCTAATAACTTGAAAGTATGGATTGAAG  
ATGGACCTACCAAACCTTACAAATACTTTAACAAACAAACCAAACAAGAATACA

ACAAACCAGTGAACATACGTGACTATAACATGTGTATATCTGTTTAAACAAAGATAA  
GATAACAGAAGAAGGTATGGATGGTACTATGCTAGTGGTAACGGCGGCATTAT  
T

>Seq8 [organism=organism=Aleutian mink disease virus] Aleutian mink disease virus isolate  
AMDV\_IS\_H8 non-structural protein 1 gene (NS1), partial cds

CTTTGATAAAGATGAAGATCCTAAGGATATTCAAAAATCCTTAGGTTGGTTTATT  
AAAAAACTAAGTAGAGACATAGCAGTTGTTTATAGTAACCATCATTGTGACCTGC  
AAGGTATAACAAGATTCTGAAGGTAGATCTAATAACTTGAAAGTATGGATTGAAG  
ATGGACCTACCAAACCTTACAAATACTTTAACAAACAAACCAAACAAGAATACA  
ACAAACCAGTGAACATACGTGACTATAACATGTGTATATCTGTTTAAACAAAATAA  
GATAACAGAAGAAGGTATGGATGGTACTATGCTAGTGGTAACGGCGGCATTAT  
T

>Seq9 [organism=organism=Aleutian mink disease virus] Aleutian mink disease virus isolate  
AMDV\_IS\_H9 non-structural protein 1 gene (NS1), partial cds

CTTTAATAAAGATGAAGATCCTAAGGATATTCAAAAATCCTTAGGTTGGTTTATT  
AAAAAACTAAGTAAAGACTTAGCAGTTGTTTATAGTAACCATCATTGTGACCTGC  
AAGGTATAACAAGACTCTGAAAGTAGATCTAATAACTTGAAAGTATGGATTGAAG  
ATGGACCTACAAAACCTTACAAATACTTTAACAAACAAACCAAACAAGAATACA  
ACAAACCAGTGAACATACGTGACTATAACATGTGTATATCTGTTTAAACAAAGATAA  
GATAACAGAAGAAGGTATGGATGGTACTATGCTAGTGGTAACGGCGGCATTAT  
T

>Seq10 [organism=organism=Aleutian mink disease virus] Aleutian mink disease virus  
isolate AMDV\_IS\_H10 non-structural protein 1 gene (NS1), partial cds

CTTTAATAAAGATGAAGATCCTAAGGATATTCAAAAATCCTTAGGTTGGTTTGT  
AAAAAACTAAGTAAAGACATAGCAGTTGTTTATAGTAACCATCATTGTGACCTGC  
AAGGTATAACAAGATTCTGAAGGTAGATCTAATAACTTGAAAGTATGGATTGAAG  
ATGGACCTACCAAACCTTACAAATACTTTAACAAACAAACCAAACAAGAATACA  
ACAAACCAGTGAACATACGTGACTATAACATGTGTATATCTGTTTAAACAAAGATAA  
GATAACAGAAGAAGGTATGGATGGTACTATGCTAGTGGTAACGGCGGCATTAT  
T

>Seq11 [organism=organism=Aleutian mink disease virus] Aleutian mink disease virus  
isolate AMDV\_IS\_H11 non-structural protein 1 gene (NS1), partial cds

CTTTGATAAAGATGAAGATCCTAAGGATATTCAAAAATCCTTAGGTTGGTTTATT  
AAAAAACTAAGTAGAGACATAGCAGTTGTTTATAGTAACCATCATTGTGACCTGC  
AAGGTATAACAAGATTCTGAAAGTAGATCTAATAACTTGAAAGTATGGATTGAAG  
ATGGACCTACCAAACCTTACAAATACTTTAACAAACAAACCAAACAAGAATACA  
ACAAACCAGTAAACATACGTGACTATAACATTAATATATCTGTTTAAACAAAGATAA  
GATAACAGAAGAAGGTATGGATGGTACTATGCTAGTGGTAACGGCGGCATTAT  
T

>Seq12 [organism=organism=Aleutian mink disease virus] Aleutian mink disease virus  
isolate AMDV\_IS\_H12 non-structural protein 1 gene (NS1), partial cds

CTTTGATAAAGATGAAGATCCTAAGGATGTTCAAAAATCCTTAGGTTGGTTTATT  
AAAAAACTAATAGAGACATAGCAGTTGTTTATAGTAACCATCATTGTGACATAC  
AAGATATAACAAGATCCTGAAAGTAGATCTAATAACTTGAAAGTATGGATTGAAG  
ATGGGCCTACTAAACCTTACAAATACTTTAACAAACAAACCAAACAAGAATACA  
ACAAACCAGTGAACATGCGTGACTATAACATTAATATATCTGTTTAAACAAAGATA  
AGATAACAGAAGAAGGTATGGATGGTACTATGCTAGTGGTAACGGCGGCATTA  
TT

>Seq13 [organism=organism=Aleutian mink disease virus] Aleutian mink disease virus  
isolate AMDV\_IS\_H13 non-structural protein 1 gene (NS1), partial cds

CTTTGATAAAGATGAAGATCCTAAGGATATTCAAAAATCCTTAGGTTGGTTCATT  
AAAAAACTAAATAAAGACATAGCAGTTGTTTATAGTAACCATCATTGTGACATGC  
AAGGTCTACAAGATCCTGAAAGTAGATCTAATAACTTGAAAGTATGGATTGAAG  
ATGGACCTACCAAACCTTACAAATACTTTAACAGACAAACCAAACAAGAATACA  
ACAAACCAGTGAACATGCGTGACTATACATTAATATATCTGTTTAAACAAAGATAA  
GATAACAGAAGAAAGTATGGATGGTACTATGCTAGTGGTAACGGTGGCATTAT  
T

>Seq14 [organism=organism=Aleutian mink disease virus] Aleutian mink disease virus  
isolate AMDV\_IS\_H14 non-structural protein 1 gene (NS1), partial cds

CTTTGATAAAGATGAAGATCCTAAGGATATTCAAAAATCCTTAGGTTGGTTTATT  
AAAAAACTAAATAAAGACATAGCAGTTGTTTATAGTAACCATCATTGTGACATGC  
AAGGTATAACAAGATCCTGAAAGTAGATCTAATAACTTAAAAGTATGGATTGAAG  
ATGGACCTACCAAACCTTACAAATACTTTAACAGACAAACCAAACAAGAATACA  
ACAAACCAGTGAACCTTGCCTGACTATACATTAATATATCTGTTTAAACAAAATAA  
GATAACAGAAGATGGTATGGATGGTACTATGCTAGTGGTAACGGTGGCATTAT

>Seq15 [organism=organism=Aleutian mink disease virus] Aleutian mink disease virus  
isolate AMDV\_IS\_H15 non-structural protein 1 gene (NS1), partial cds

CTTTGATAAAGATGAAGATCCTAAGGATATTCAAAAATCCTTAGGTTGGTTTATT  
AAAAAACTAAATAAAGACGTAGCAGTTGTTTATAGTAACCATCATTGTGACATGC  
AAGGTATAACAAGATCCTGAAAGTAGATCTAATAACTTGAAAATATGGATTGAAG  
ATGGACCTACCAAACCTTACAAATACTTTAACAAACAAACCAAACAAGAATACA  
ACAAAACAGTGAACATGCGTGACTATACATTAATATATCTGTTTAAACAAAATAA  
GATAACAGAAGAAGGTATGGATGGTACTATGCTAGTGGTAACGGTGGCATTAT  
T

>Seq16 [organism=organism=Aleutian mink disease virus] Aleutian mink disease virus  
isolate AMDV\_IS\_H16 non-structural protein 1 gene (NS1), partial cds

CTTTGATAAAGATGAAGATCTTAAGGATATTCAAAAATCCTTAGGTTGGTTTGT  
AAAAAAATAAGTAGAGACATAGCAGTTGTTTATAGTAACCATCATTGTGACCTGC  
AAGGTATAACAAGATTTTGAAAGTAGATTTAATAACTTGAAAGTATGGATTGAAG  
ATGGACCTTCCCAACCTTACAAATACTTTAACAAACCAAACCAAACAAGAATACA  
ACAACCCAGTGAACATACGTGACTATACATTAATATATCTGTTTAAACAAAGATAA  
GATAACAGAAGAAGGTATGGATGGTACTATGCTAGTGGTAACGGCGGCATTAT  
T

>Seq17 [organism=organism=Aleutian mink disease virus] Aleutian mink disease virus  
isolate AMDV\_IS\_H17 non-structural protein 1 gene (NS1), partial cds

CTTTGATAAAGATGAAGATCCTAAGGATATTCAAAAATCCTTAGGTTGGTTTATT  
AAAAAACTAAATAGAGACATAGCAGTTGTTTTTAGTAACCATCATTGTGACATAC  
AAGATATAACAAGATCCTGAAAGTAGATCTAATAACTTGAAAGTATGGATTGAAG  
ATGGGCCTACTAAACCTTACAAATACTTTAACAGACAAACCAAACAAGAATACA  
ACAAACCAGTGAACATACGTGACTATACGTTTCATATATCTGTTTAAACAAAGATAA  
GATAACAGAAGAAGGTATGGATGGTACTATGCTAGTGGTAACGGCGGCATTAT  
T

>Seq18 [organism=organism="Aleutian mink disease virus"] Aleutian mink disease virus  
isolate AMDV\_IS\_H18 non-structural protein 1 gene (NS1), partial cds

CTTTGATAAAGATGAAGATCCTAAGGATATTCAAAAATCCTTAGGTTGGTTTATT  
AAAAAACTAAATAGAGACATAGCAGTTGTTTTTAGTAACCATCATTGTGACATAC  
AAGGTATAACAAGATCCTGAAAGTAGATCTAATAACTTGAAAGTATGGATTGAAG  
ATGGGCCTACTAAACCTTACAAATACTTTAACAAACAAACCAAACAAGAATACA  
ACAAACCAGTGAACATACGTGACTATACATTAATATATCTGTTTAAACAAAGATAA

GATAACAGAAGAAGGTATGGATGGTACTATGCTAGTGGTAACGGCGGCATTAT  
T

>Seq19 [organism=organism=Aleutian mink disease virus] Aleutian mink disease virus  
isolate AMDV\_IS\_H19 non-structural protein 1 gene (NS1), partial cds

CTTTGATAAAGATGAAGATCCTAAGGATATTCAAAAATCCTTAGGTTGGTTTATT  
AAAAAACTAAGTAAAGACATAGCAGTTGTTTATAGTAACCATCATTGTGACATGC  
AAGGTATACAAGATCCTGAAGGTAGATCTAATAACTTGAAAGTATGGATTGAAG  
ATGGACCTACCAAACCTTACAAATACTTTAACAAACAAACCAAACAAGAATACA  
ACAAACCAGTGAACATGCGTGACTATACATTAATATATCTGTTTAAACAAAGATAA  
GATAACAGAAGAAAGTATGGATGGTACTATGCTAGTGGTAACGGTGGCATTAT  
T

>Seq20 [organism=organism=Aleutian mink disease virus] Aleutian mink disease virus  
isolate AMDV\_IS\_H20 non-structural protein 1 gene (NS1), partial cds

CTTTGATAAAGATGAAGATCCTAAGGATATTCAAAAATCATTAGGTTGGTTTATT  
AAAAAACTAAATAAAGACATAGCAGTTGTTTATAGTAACCATCATTGTGACATGC  
AAGATATACAAGATCCTGAAGGTAGATCTAATAACTTGAAAGTATGGATTGAAG  
ATGGACCAACCAAACCTTACAAATACTTTAACAGACAAACCAAACAAGAATACA  
ACAAACCAGTGAACATGCGTGACTATACATTAATATATCTGTTTAAACAAAATAA  
GATAACAGAGGAAGGTATGGATGGTACTATGCTAGTGGTAACGGTGGCATTAT  
T

>Seq21 [organism=organism=Aleutian mink disease virus] Aleutian mink disease virus  
isolate AMDV\_IS\_H21 non-structural protein 1 gene (NS1), partial cds

CTTTGATAAAGATGAAGATCCTAAGGATATTCAAAAATCCTTAGGTTGGTTTATT  
AAAAAACTAAATAAAGACATAGCAGTTGTTTATAGTAACCATCATTGTGACATGC  
AAGGTATACAAGATCCTGAAAGTAGATCTAATAACTTGAAAGTATGGATTGAAG  
ATGGACCTACCAAACCTTACAAATACTTTAACAGACAAACCAAACAAGAATACA  
ACAAACCAGTGAACATGCGTGACTATACATTAATATATCTGTTTAAACAAAGATAA  
GATAACAGAAGAAGGTATGAATGGTACTATGCTAGTGGTAACGGTGGCATTAT  
T

>Seq22 [organism=organism=Aleutian mink disease virus] Aleutian mink disease virus  
isolate AMDV\_IS\_H22 non-structural protein 1 gene (NS1), partial cds

CTTTGATAAAGATGAAGATCCTAAGGATATTCAAAAATCCTTAGGTTGGTTTATT  
AAAAAACTAAATAAAGACATAGCAGTTGTTTATAGTAACCATCATTGTGACATGC  
AAGGTATACAAGATCCTGAAAGTAGATCTAATAACTTGAAAGTATGGATTGAAG  
ATGGACCTACCAAACCTTACAAATACTTTAACAAACAAACCAAACAAGAATACA  
ACAAACCAGTGAACATGCGTGACTATACATTAATATATCTGTTTAAACAAAATAA  
GATAACAGAAGATAGTATGGATGGTACTATGCTAGTGGTAACGGTGGCATTATT

>Seq23 [organism=organism=Aleutian mink disease virus] Aleutian mink disease virus  
isolate AMDV\_IS\_H23 non-structural protein 1 gene (NS1), partial cds

CTTTGATAAAGATGAAGATCCTAAGGATATTCAAAAATCCTTAGGTTGGTTTATT  
AAAAAACTAAATAAAGACTTAGCAGTTGTTTATAGTAACCATCATTGTGACCTGC  
AAGGTATACAAGATACTGAAGGTAGATCTAATAATTTGAAAGTATGGATTGAAG  
ATGGACCTACCAAACCTTACAAATACTTTAACAAACAAACCAAACAAGAATACA  
ACAAACCAGTGAACATACGTGAATATACATTAATATATCTGTTTAAACAAAGATAA  
GATAACAGAGGAAGGTATGGATGGTACTATGCTAGTGGTAACGGCGGCATTAT  
T

>Seq24 [organism=organism=Aleutian mink disease virus] Aleutian mink disease virus  
isolate AMDV\_IS\_H24 non-structural protein 1 gene (NS1), partial cds

CTTTGATAAAGATGAAGATCCTAAGGATATTCAAAAATCCTTAGGTTGGTTTATT  
AAAAAACTAAGTAGAGACTTAGCAGTTGTTTATAGTAACCATCATTGTGACATGC

AAGGTATACAAGATTCTGAAAGTAGATCTAATAACTTGAAAGTATGGATTGAAG  
ATGGACCTACCAAACCTTACAAATACTTTAACAAACAAACCAAACAAGAATACA  
ACAAACCAGTGAACGTACGTGACTATACAGTAGTATATCTGTTTAACAAAGATA  
AGATAACAGAAGAAGGTATGGATGGTTACTATGCTAGTGGTAACGGCGGCATTA  
TT

>Seq25 [organism=organism=Aleutian mink disease virus] Aleutian mink disease virus  
isolate AMDV\_IS\_H25 non-structural protein 1 gene (NS1), partial cds

CTTTGATAAAGATGAAGATCCTAAGGATATTCAAAAATCCTTAGGTTGGTTTATT  
AAAAAACTAAATAGAGACTTAGCAGTTGTTTATAGTAACCATCATTGTGACCTGC  
AAGGTATACAAGACTCTGAAAGTAGATCTAATAACTTGAAAGTATGGATTGAAG  
ATGGGCCTACAAAACCTTACAAATACTTTAACAGACAAACCAAACAAGAATACA  
ACAAACCAGTAAACATGCGTGACTATACAATAGTATATCTGTTTAACAAAGATA  
AGATAACAGAAGAAGGTATGGATGGTTACTATGCTAGTGGTAACGGCGGCATTA  
TT

>Seq26 [organism=organism=Aleutian mink disease virus] Aleutian mink disease virus  
isolate AMDV\_IS\_H26 non-structural protein 1 gene (NS1), partial cds

CTTTGATAAAGATGAAGATCCTAAGGATATTCAAAAATCCTTAGGTTGGTTTATT  
AAAAAACTAAGTAAAGACTTAGCAGTTGTTTATAGTAACCATCATTGTGACCTGC  
AAGGTATACAAGACTCTGAAAGTAGATCTAATAACTTGAAAGTATGGATTGAAG  
ATGGGCCTACAAAACCTTACAAATACTTTAACAGACAAACCAAACAAGAATACA  
ACAAACCAGTAAACATACGTGACTATACAGTAGTATATCTGTTTAACAAAGATA  
AGATAACAGAAGAAGGTATGGATGGTTACTATGCTAGTGGTAACGGCGGCATTA  
TT

>Seq27 [organism=organism=Aleutian mink disease virus] Aleutian mink disease virus  
isolate AMDV\_IS\_H27 non-structural protein 1 gene (NS1), partial cds

CTTTGATAAAGATGAAGATCCTAAGGATATTCAAAAATCCTTAGGTTGGTTTATT  
AAAAAACTAAATAAAGACTTAGCAGTTGTTTATAGTAACCATCATTGTGACCTGC  
AAGGTATACAAGACTCTGAAAGTAGATCTAATAACTTGAAAGTATGGATTGAAG  
ATGGGCCTACAAAACCTTACAAATACTTTAACAGACAAACCAAACAAGAATACA  
ACAAACCAGTAAACATACGTGACTATACAGTAGTATATCTGTTTAACAAAGATA  
AGATAACAGAAGAAGGTATGGATGGTTACTATGCTAGTGGTAACGGCGGCATTA  
TT

>Seq28 [organism=organism=Aleutian mink disease virus] Aleutian mink disease virus  
isolate AMDV\_IS\_H28 non-structural protein 1 gene (NS1), partial cds

CTTTGATAAAGATGAAGATCCTAAGGATATTCAAAAATCCTTAGGTTGGTTTATT  
AAAAAACTAAGTAGAGACTTAGCAGTTGTTTATAGTAACCATCATTGTGACATGC  
AAGGTATACAAGATTCTGAAAGTAGATCTAATAACTTGAAAGTATGGATTGAAG  
ATGGACCTACCAAACCTTACAAATACTTTAACAAACAAACCAAACAAGAATACA  
ACAAACCAGTGAACGTACGTGACTATACATTAATATATCTGTTTAACAAAGATAA  
GATAACAGAAGAAGGTATGGATGGTTACTATGCTAGTGGTAACGGCGGCATTAT  
T

>Seq29 [organism=organism=Aleutian mink disease virus] Aleutian mink disease virus  
isolate AMDV\_IS\_H29 non-structural protein 1 gene (NS1), partial cds

CTTTGATAAAGATGAAGATCCTAAGGATATTCAAAAATCCTTAGGTTGGTTTATT  
AAAAAACTAAATAGAGACATAGCAGTTGTTTATAGTAACCATCATTGTGACCTGC  
AAGGTATACAAGATTCTGAAAGTAGATCTAATAACTTGAAAATATGGATTGAAG  
ATGGACCTACCAAACCTTACAAATACTTTAACAAACAAACCAAACAAGAATACA  
ACAAACCAGTGAACATGCGTGACTATACATTAATATATCTGTTTAACAAAGATAA  
AATAACAGAAGAAGGTATGGATGGTTACTATGCTAGTGGTAACGGTGGCATTAT  
T

>Seq30 [organism=organism=Aleutian mink disease virus] Aleutian mink disease virus isolate AMDV\_IS\_H30 non-structural protein 1 gene (NS1), partial cds

CTTTGATAAAGATGAAGATCCTAAGGATATTCAAAAATCCTTAGGTTGGTTTATT  
AAAAAACTAAATAAAGACTTAGCAGTTGTTTATAGTAACCATCATTGTGACCTGC  
AAGGTATACAAGACTCTGAAAGTAGATCTAATAACTTGAAAGTATGGATTGAAG  
ATGGGCCTACAAAACCTTACAAATACTTTAACAGACAAACCAAACAAGAATACA  
ACAAACCAGTGAACATACGTGACTATACATTAATATATCTGTTTAACAAAGATAA  
GATAACAGAAGAAGGTATGGATGGTACTATGCTGGTGGTAACGGCGGCATTAT  
T

>Seq31 [organism=organism=Aleutian mink disease virus] Aleutian mink disease virus isolate AMDV\_IS\_H31 non-structural protein 1 gene (NS1), partial cds

CTTTGATAAAGATGAAGATCCTAAGGATATTCAAAAATCCTTAGGTTGGTTTATT  
AAAAAACTAAGTAGAGACTTAGCAGTTGTTTATAGTAACCATCATTGTGACATGC  
AAGATATACAAGATTCTGAAAGTAGATCTAATAACTTGAAAGTATGGATTGAAG  
ATGGACCTACCAAACCTTACAAATACTTTAACAGACAAACCAAACAAGAATACA  
ACAAACCAGTGAACATACGTGACTATACATTAATATATCTGTTTAACAAAGATAA  
GATAACAGAAGAAGGTATGGATGGTACTATGCTAGTGGTAACGGCGGCATTAT  
T

>Seq32 [organism=organism=Aleutian mink disease virus] Aleutian mink disease virus isolate AMDV\_IS\_H32 non-structural protein 1 gene (NS1), partial cds

CTTTGATAAAGATGAAGATCCTAAGGATATTCAAAAATCCTTAGGTTGGTTTATT  
AAAAAACTAAGTAGAGACATAGCAGTTGTTTATAGTAACCATCATTGTGACCTGC  
AAGGTATACAAGATTCTGAAGGTAGATCTAATAACTTGAAAGTATGGATTGAAG  
ATGGACCTACCAAACCTTACAAATACTTTAACAGACAAACCAAACAAGAATACA  
ACAAACCAGTAAACATGCGTGACTATACATTAATATATCTGTTTAACAAAATAA  
GATAACAGAAGAAGGTATGGATGGTACTATGCTAGTGGTAACGGCGGCATGAT  
T

>Seq33 [organism=organism=Aleutian mink disease virus] Aleutian mink disease virus isolate AMDV\_IS\_H33 non-structural protein 1 gene (NS1), partial cds

CTTTGATAAAGATGAAGATCCTAAGGATATTCAAAAATCCTTAGGTTGGTTTATT  
AAAAAACTAAGTAAAGACTTAGCAGTTGTTTATAGTAACCATCATTGTGACCTGC  
AAGATATACAAGATCCTGAAAGTAGATCTAATAACTTGAAAATATGGATTGAAG  
ATGGGCCTACAAAACCTTACAAATACTTTAACAGACAAACCAAACAAGAATACA  
ACAAACCAGTGAACGTACGTGACTATACATTAATATATCTGTTTAACAAAGATAA  
GATAACAGAAGAAGGTATGGATGGTACTATGCTGCTGGTAACGGCGGCATTAT  
T
